# Supplementary material
Source: MDPI journal article supplement (https://www.mdpi.com/1424-2818/12/7/272)
Supplement: s1 [file s1]

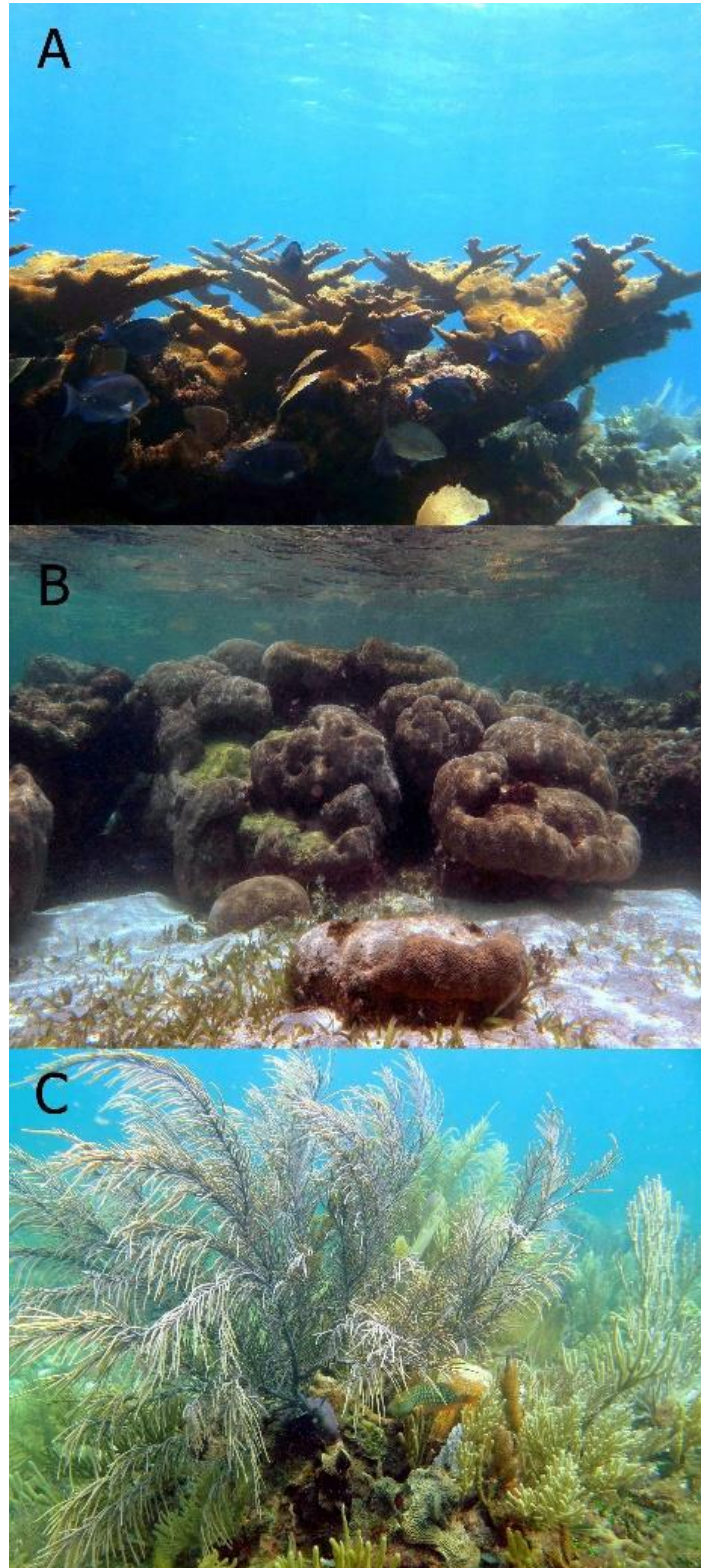

Figure S1: Puerto Morelos coral reefs. A: *Acropora palmata* colonies. B: *Orbicella annularis* colonies. C: Soft corals colonies. Photo H. Caballero-Aragón.

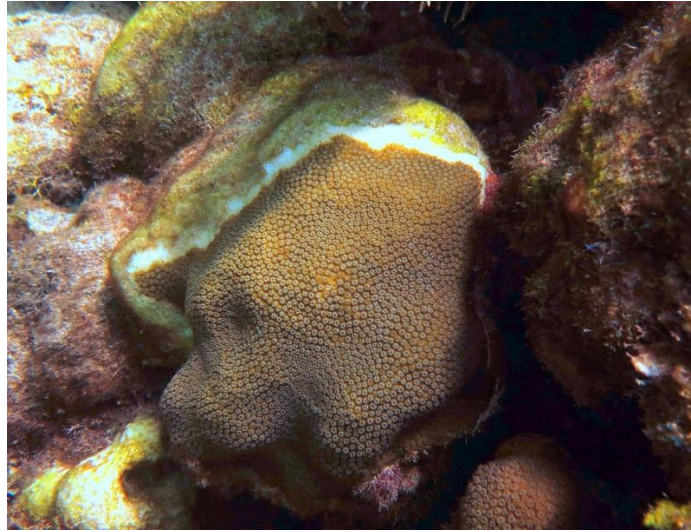

Figure S2: *Orbicella annularis* colony affected by "stony coral tissue loss disease". Photo H. Caballero-Aragón.

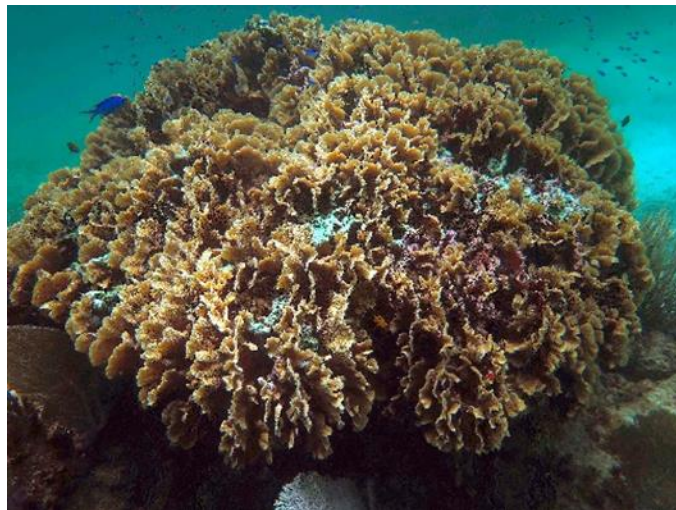

Figure S3: Colonies of *Agaricia tenuifolia*. Photo H. Caballero-Aragón.
